# Supplementary material
Source: MDPI journal article supplement (https://www.mdpi.com/2075-5309/8/8/102)
Supplement: s1 [file s1]

Dear Colleagues:

Thank you very much for useful feedback. Alterations are displayed in red color in the text of the revised paper. Images are now grouped in four figures placed in a separate PDF. Many Thanks in advance for reviewing the paper again. Best Regards,

|   | Comment                                                                                                                                                                                                                                                                                                | Response                                                                                                                                                                                                                                                                                                                                                                                                  |
|---|--------------------------------------------------------------------------------------------------------------------------------------------------------------------------------------------------------------------------------------------------------------------------------------------------------|-----------------------------------------------------------------------------------------------------------------------------------------------------------------------------------------------------------------------------------------------------------------------------------------------------------------------------------------------------------------------------------------------------------|
| # | <b>Reviewer # 1</b>                                                                                                                                                                                                                                                                                    |                                                                                                                                                                                                                                                                                                                                                                                                           |
| 1 | The social and economic sustainability of the examined buildings                                                                                                                                                                                                                                       | Valid points. However, the paper's focus is on sustainable design and iconicity nexus as stated in the 5 questions in section <i>1.4 Goal of study and scope of work</i><br><br>Reviewer #3 acknowledges this focus in point #6<br><br>Nevertheless, the revised paper partially addresses these issues in the Discussion (pages 12-23) Conclusions (pages 23-25) and Future Research (page 25) Sections. |
| 2 | Climatic aspects and functional use of buildings need to be added to Table 1                                                                                                                                                                                                                           | These are added to Table 1; please see pages 12-14                                                                                                                                                                                                                                                                                                                                                        |
|   | <b>Reviewer # 2</b>                                                                                                                                                                                                                                                                                    |                                                                                                                                                                                                                                                                                                                                                                                                           |
| 1 | Add depth to discussion; offer greater critiques<br><br>"A stronger paper would look at what is unique about tall buildings, and what are the features that would really contribute to sustainability, given the specific constraints and opportunities that they present"                             | The Discussion Section (6) has been completely revamped addressing these points. Each issue is now examined in a greater depth. Please see pages 12-23<br>Also, please see the Conclusions, pages 23-25                                                                                                                                                                                                   |
| 2 | Be careful in using citations                                                                                                                                                                                                                                                                          | Addressed, e.g. see page 11                                                                                                                                                                                                                                                                                                                                                                               |
|   | <b>Reviewer # 3</b>                                                                                                                                                                                                                                                                                    |                                                                                                                                                                                                                                                                                                                                                                                                           |
| 1 | Last paragraph of section 1.2. I would propose to the authors to incorporate the Commerzbank Headquarters in Frankfurt by Foster as the first ecological office skyscraper in the world and a significant example of sustainable architecture.                                                         | This has been added. Please see pages 2 & 3                                                                                                                                                                                                                                                                                                                                                               |
| 2 | The paper includes 30 towers that "were constructed mainly in the past two decades". This reviewer think it would be more interesting to think of it as a 21st century, even if this means eliminating some example. In addition it could also appear in the title: "XXI century" instead of "recent". | This is now reflected in the paper title: Sustainability and the 21st Century Vertical City: A Review of Design Approaches of Tall Buildings                                                                                                                                                                                                                                                              |

|   |                                                                                                                                                                                                                                                   |                                                                                                                                                                                                               |
|---|---------------------------------------------------------------------------------------------------------------------------------------------------------------------------------------------------------------------------------------------------|---------------------------------------------------------------------------------------------------------------------------------------------------------------------------------------------------------------|
| 3 | There are examples without figure. It would be interesting to illustrate all buildings (2.6,2.7,2.8...). It would be more appropriate to group several figures in one or two pages instead of placing the figure behind their corresponding text. | All 30 case studies now have images, and are grouped in four major figures based on their continents.                                                                                                         |
| 4 | Swiss Re Tower (I prefer called 30st Mary Axe). Please complete the text with reference to spiral atriums as "lungs" of the building, which distribute fresh air and allow reduce the use of air conditioning.                                    | <p>The building's name has been changed throughout the paper.</p> <p>Issues related to the building's spiral atriums, layout and natural ventilation scheme (building's lung) are now addressed in page 7</p> |
| 5 | Please complete table 1 with a column indicating the climate of each city.                                                                                                                                                                        | Completed                                                                                                                                                                                                     |
| 6 | Conclusions. I think that this section would gain clarity if its structure is more linked to the 5 questions proposed in section 1.4.                                                                                                             | The Conclusions Section has been revised accordingly, pages 23-25                                                                                                                                             |
| 7 | Please complete references 12, 13, 18 indicating last web access.                                                                                                                                                                                 | Completed                                                                                                                                                                                                     |
